# Supplementary material for: Three Dimensional NiS-MoOx/CC Nanosheet Array for Efficient Electrocatalytic Oxygen Evolution Reaction
Source: Research Square preprint supplement (doi:10.21203/rs.3.rs-6326912/v1), 2025-04-03
Supplement: Supplementary file 1 [file 959400eab47ffac65be4093c.docx]

Supplementary Information

**Three dimensional NiS-MoOx/CC nanosheet Array for efficient electrocatalytic oxygen evolution reaction**

Weiwei Zhang*,a, Haidong Yang*,b, Hui Wanga

a Dongying Haike Ruilin Chemical Co., Ltd, North of Gangchenglu, Dongying Port Economic Development Zone, Dongying, 257000 (P.R. China)

b Northwest Normal University College of Chemistry and Chemical Engineering No.967 Anning East Road Lanzhou, 730070 (P.R. China)

E-mail: zhangweiwei@stu.pku.edu.cn (Weiwei Zhang,corresponding author)

yhd19852007@163.com (Haidong Yang, corresponding author)

**1. Methods**

**Chemicals:** Nickel nitrate hexahydrate (Ni(NO3)2·6H2O), ammonium fluoride (NH4F) and thiourea (CH4N2S) were purchased from Sinopharm Chemical Reagents Co., Ltd. Sodium molybdate dihydrate (Na2MoO4·2H2O) was obtained from Shanghai Energy and Chemical Co., Ltd. Nitric acid (HNO3) was obtained from Beijing Chemical Plant. Sulfuric acid (H2SO4) was obtained from Chengdu Kelong Chemical Co., Ltd. Ammonium hydroxide (NH4OH) was obtained from Tianjin Kemiou Chemical Reagent Co., Ltd. Urea (CO(NH2)2) was obtained from Tianjin Dengfeng chemical reagent factory. Ethanol (C2H6O) was obtained from Lianlong Bohua Pharmaceutical Chemical Co., Ltd. All chemical reagents used without further purification., and all chemical reagents were used without further purification.

**Processing of carbon cloth (CC) :**

The carbon cloth was firstly cut into 1 × 2 cm2 and ultrasonicated with acetone for 30 min, then rinsed with deionized water for several times, soaked in mixed acid (HNO3:H2SO4 = 3:1), and finally rinsed with deionized water for several times and dried at 60 ℃.

**Synthesis of NiS-MoOx/CC:**

NiS-MoOx/CC was synthesized by a simple hydrothermal method. Briefly, 0.6 mmol Ni(NO3)2⋅6H2O was dissolved in deionized water (52 ml) and stirred for about 10 min to obtain a green solution, then 8 ml NH4OH (25 %) was added to adjust the PH value, and subsequently put the precursor (MoS2/CC) into the solution. The mixture was transferred into a 100 ml Teflon-lined high-pressure reactor and heated at 180 ℃ for 3 h. After cooling down to room temperature, the sample was washed with deionized water and ethanol at least three times and dried at 60 ℃. The obtained sample was denoted as NiS-MoOx/CC. By adjusting content of Ni(NO3)2⋅6H2O (0.4 mmol, 0.5 mmol, 0.6 mmol, 1 mmol, 2 mmol), the obtained samples were named as NiS-MoOx/CC-0.4, NiS-MoOx/CC-0.5, NiS-MoOx/CC-0.6, NiS-MoOx/CC-1 and NiS-MoOx/CC-2, respectively. Take a similar preparation approach, the sample by adding only processed CC is denoted as Ni(OH)2/CC.

**Synthesis of MoS2/CC:**

2 mmol Na2MoO4⋅2H2O and 8 mmol CH4N2S were dissolved in deionized water (60 mL) and stirred for about 15 min. The treated CC was immersed in the solution, and then transferred to a 100 mL Teflon-lined high pressure reactor for hydrothermal reaction at 200 ℃ for 24 h, and finally washed with deionized water and ethanol at least three times and dried naturally at room temperature.

**Synthesis of NiS/CC:**

Ni(NO3)2⋅6H2O (0.3 g), CO(NH2)2 (0.3 g) and HH4F (0.1 g) were dissolved in deionized water (20 mL) and stirred for about 30 min. The treated CC was immersed in the solution, and then put it into a 25 ml Teflon-lined high pressure reactor for hydrothermal reaction at 120 ℃ for 6 h, and subsequently washed repeatedly with ethanol and deionized water for several times and dried at room temperature. Then, the obtained sample was immersed in the solution that is composed of Na2S (0.48 g) and deionized water (20 mL), whereafter the vulcanization process was proceed at 120 ℃ for 8 h, and finally washed with ethanol and deionized water for several times and dried at 60 ℃. The obtained sample was recorded as NiS/CC.

**2. Structure characterization**

The scanning electron microscopy were performed on ULTRA plus. The powder X-ray diffraction (XRD) patterns were performed on a Rigaku Smart Lab X-ray diffractometer operated at 40 kV using 0.154 nm Cu kα radiation at a scanning rate of 6◦/min. The morphology and structure were observed under a Talos F200s High-resolution transmission electron microscope (HR-TEM) with an accelerating voltage of 200 kV. X-ray photoelectron spectroscopy (XPS) was collected by a scanning X-ray microprobe (Al Kα hv = 1486.6 eV) to analyze the chemical states of the elements, and the binding energies of all elements were calibrated by using the C 1s peak of adventitious carbon at 284.60 eV.

**3. Electrochemical Measurements**

All potentials mentioned here were measured without iR-correction, and OER performance tests were performed on a CHI660E electrochemical workstation, using a three-electrode system in 1.0 M KOH electrolyte. The KOH was purchased from Energy Chemica purity (Energy chemical, 99.99%). A Hg/Hg2Cl2 electrode was selected as the reference electrode and a graphite rod was selected as the opposite electrode. The obtained self-supported electrode directly was used as a working electrode. Linear sweep voltammetry (LSV) polarization curves were measured from 0 to 1V (vs. SCE) with a slow scan rate of 5 mV s-1. The measured potential can be converted into a reversible hydrogen electrode (RHE) according to the Nernst equation：

ERHE = ESCE + 0.0591 × pH + 0.2412

Tafel slopes were obtained by plotting overpotential η against log (j) from LSV curves, the overpotential (η) was calculated according to the following equation1:

η (V) = ERHE - 1.23 V

and different Tafel slopes represent different kinetic properties and mechanisms. Electrochemical impedance spectroscopy (EIS) was carried out at OCV in a frequency range of 100 K Hz to 0.1 Hz. The galvanostatic measurement at a fixed current density (j) of 10 mA⋅cm-2 were taken to investigate the catalyst stability. In a non-Faradaic region, a potential range was selected, the difference in current density and scan rates at a certain potential (generally the middle potential) is plotted, and a straight line is fitted. Half the differences about current density was calculated to obtain the value of Cdl for obtaining the related ECSA2. Cyclic voltammetry (CV) curves were measured at different scan rates of 20, 40, 60, 80, and 100 mV s-1.

Stability is also an important criterion for a catalyst material. In this work, the stability of the catalyst is tested using chronoamperometry at a voltage of 0.45 V (vs. SCE).


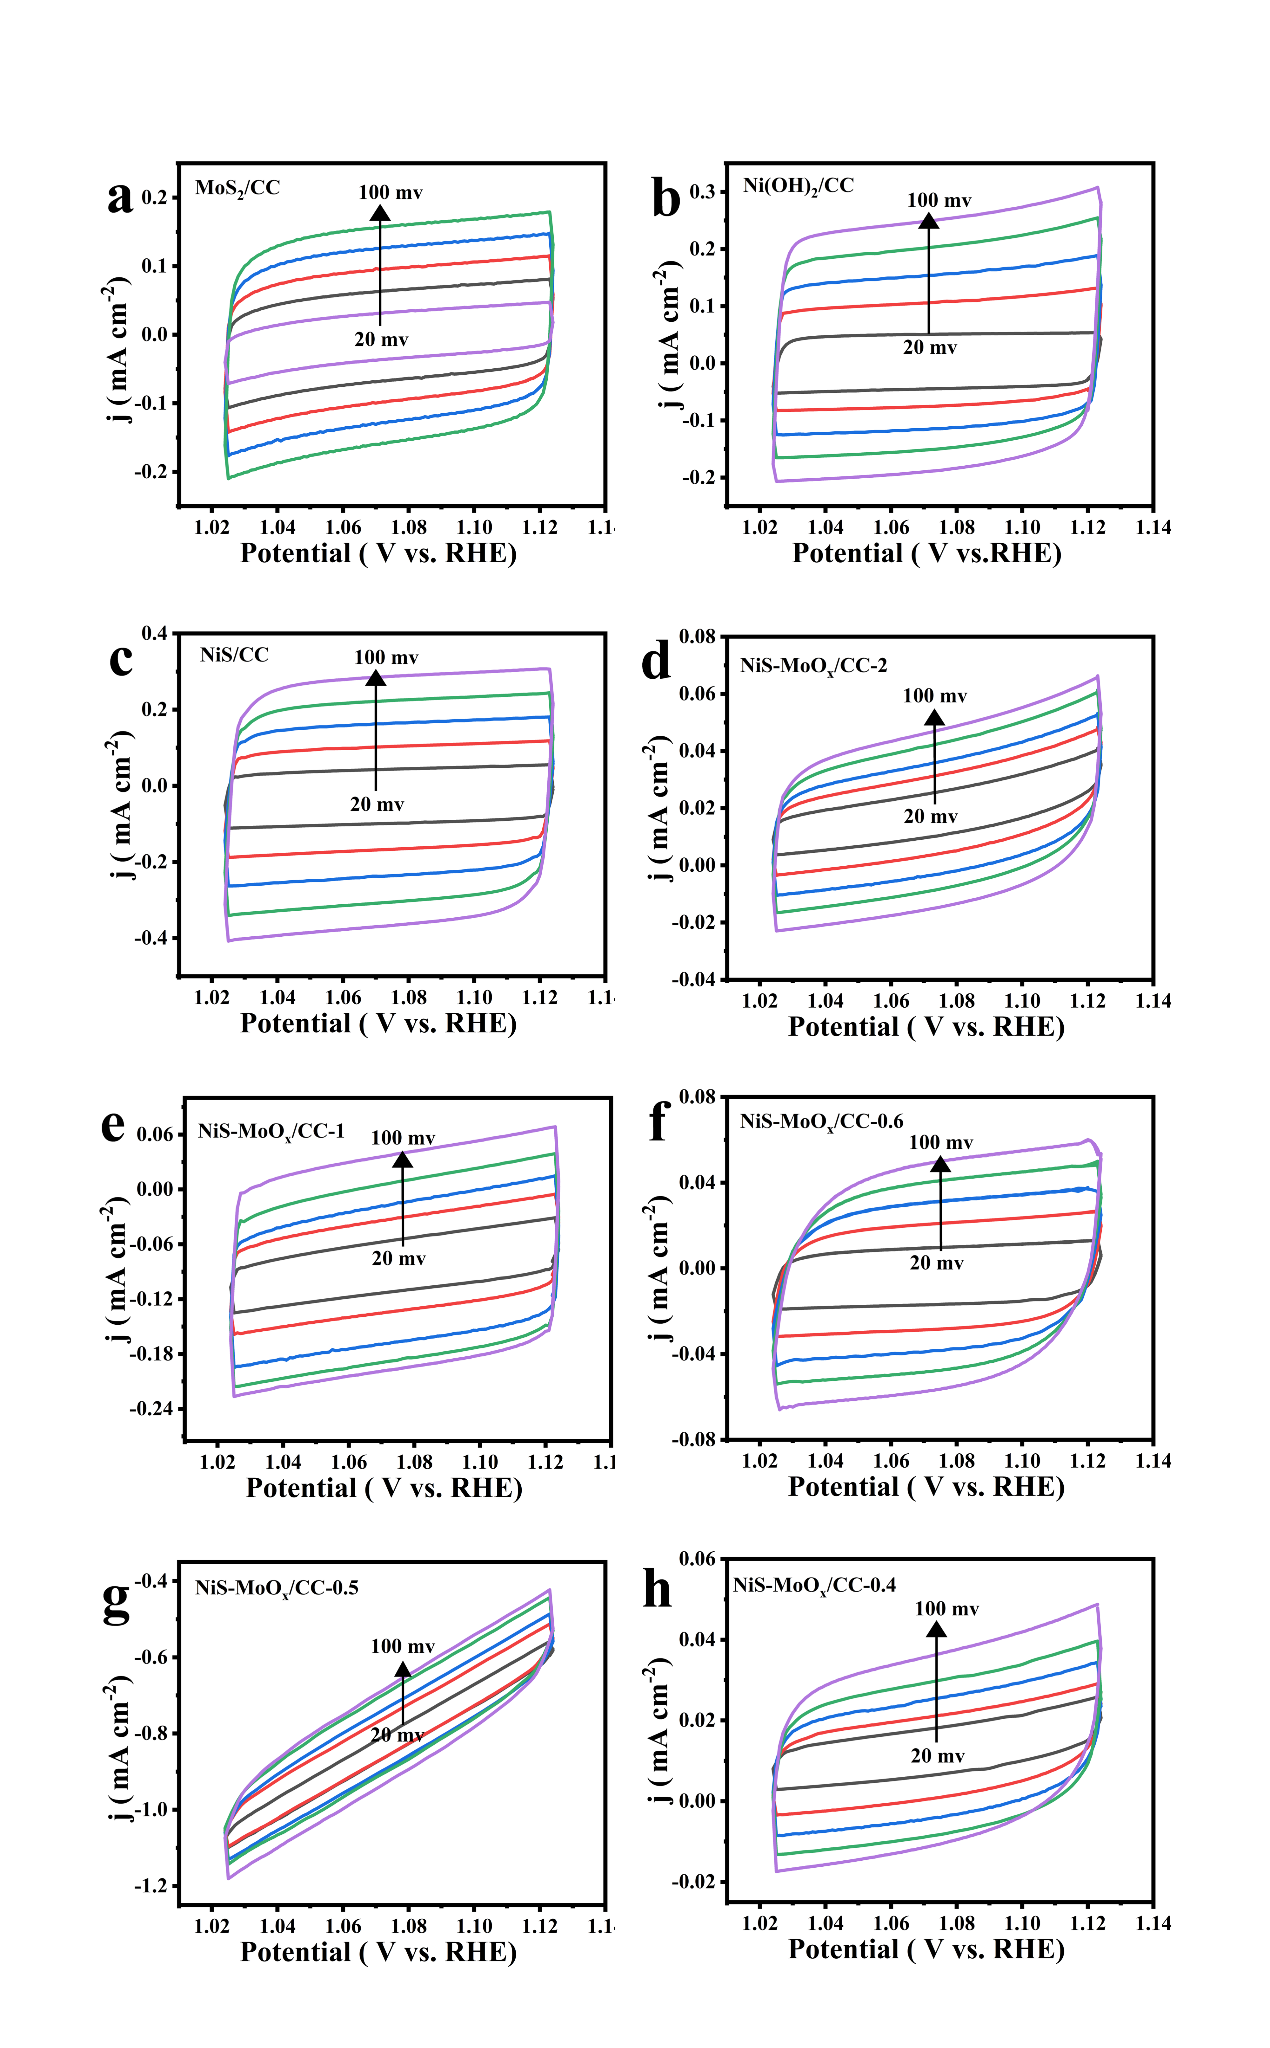


Fig. S1. The CV curves of NiS-MoOx /CC in 1.0 M KOH at different scanning rates

Table. S1. Comparison of the activity of NiS-MoOx/CC-0.6 and other catalysts at a current density of 50 mA cm-2

| Catalysts | Overpotential(mV) | Stabiltiy (h) | Tafel slope  (mV dec-1) | References |
| --- | --- | --- | --- | --- |
| **NiS-MoOx/CC-0.6** | **341** | **32** | **225.9** | **This work** |
| NCM/Ni-BDC@NF | 450 | - | 35.1 | ACS Mater. Au 2023, 3, 2, 143-163 |
| Ni5P4(hex) | 350 | - | - | Chem.Eur.J.2020,26,2693-2704 |
| NiFe2O4/Ni@C | 423 | ~6 | 53 | Nanotechnology 32 (2021) 175701 |
| Ni–Co-Mixed Oxide | 380 | 10 | 50 | Adv. Mater. 2016, 28, 4601–4605 |
| NiFe PBA | 587 | - | 131 | Chin. J. Chem. 2021, 39, 2347-2353 |
| NiS2 nanowire arrays | 367 | 18 | 22 | Int. J. Hydrogen Energy. 46 (2021) 50 e60 |
| CuS/NiS@Ni-BDC/NF | 353 | 12 | 73 | nt. J. Hydrogen Energy. 49 (2024) 647 e657 |

**References**

(1) Li, M.; Wang, X.; Liu, K.; Zhu, Z.; Guo, H.; Li, M.; Du, H.; Sun, D.; Li, H.; Huang, K.; et al. Ce-Induced Differentiated Regulation of Co Sites via Gradient Orbital Coupling for Bifunctional Water-Splitting Reactions. *Advanced Energy Materials* **2023**. DOI: 10.1002/aenm.202301162.

(2) Jiang, C.; Yang, J.; Han, X.; Qi, H.; Su, M.; Zhao, D.; Kang, L.; Liu, X.; Ye, J.; Li, J.; et al. Crystallinity-Modulated Co2–xVxO4 Nanoplates for Efficient Electrochemical Water Oxidation. *ACS Catalysis* **2021**. DOI: 10.1021/acscatal.1c04618.
